# Supplementary material for: AlCl3-promoted growth of alkylated carbon dots with an enhanced nonlinear optical response
Source: Royal Society of Chemistry journal article supplement (doi:10.1039/d1tc06064c), 2022-01-01
Supplement: d1tc06064c1.pdf [file d1tc06064c1.pdf]

## **AlCl<sub>3</sub>-promoted growth of alkylated carbon dots with enhanced nonlinear optical response**

Dandan Lu,<sup>a</sup> Keyang Yin,<sup>a</sup> Shida Hou,<sup>a,b</sup> Penghui Li,<sup>a,b</sup> Hongxia Zhu,<sup>c</sup> Hongguang Li,<sup>a,\*</sup> Jingcheng Hao<sup>a</sup>

<sup>a</sup> *Key Laboratory of Colloid and Interface Chemistry, Ministry of Education, School of Chemistry and Chemical Engineering, Shandong University, Jinan 250100, Shandong, China*

<sup>b</sup> *China Research Institute of Daily Chemistry Co., Ltd, Taiyuan 030001, China.*

<sup>c</sup> *State Key Laboratory of Biobased Materials and Green Papermaking, Qilu University of Technology (Shandong Academy of Science), Jinan 25035, China*

---

\* Author to whom correspondence should be addressed, E-mail: [hgli@sdu.edu.cn](mailto:hgli@sdu.edu.cn)

## 1. Experimental details

### 1.1 Materials and methods

Dodecylamine (DDA, 98%), *o*-dichlorobenzene (ODB, analytical grade), anhydrous aluminum chloride ( $\text{AlCl}_3$ , 99%) and anhydrous ferric chloride ( $\text{FeCl}_3$ , 99%) were purchased from Aladdin Biochemical Technology Co., Ltd (Shanghai, China). Polymethylmethacrylate (PMMA, average Mw: ~350000) was purchased from Sigma-Aldrich. Ethanol, dichloromethane ( $\text{CH}_2\text{Cl}_2$ ), *n*-hexane and *N,N*-dimethylformamide (DMF) were obtained from local supplier with the quality of analytical grade. All chemicals were used without further purification. Glasswares, including 60 mm glass petri dishes were also obtained from local supplier.

Fourier transform infrared (FTIR) spectra were recorded on a spectrometer (Tensor II) using KBr pellets. High-resolution transmission electron microscopy (HRTEM) images of CDs were recorded on a JEM2100 instrument operating at 200 kV. For sample preparation, a drop of sample solution (~20  $\mu\text{L}$ , in *n*-hexane) was placed on a holey-carbon coated copper grid (300 meshes) and dried by an infrared lamp. X-Ray photoelectron spectroscopy (XPS) spectra were recorded on an X-ray photoelectron spectrometer (ESCALAB 250) with a monochromatized Al  $\text{K}\alpha$  X-ray source (1486.71 eV). Atomic force microscopy (AFM) observation was carried out on a Dimension ICON3 scanning probe microscope (Bruker AXS S.A.S.) in tapping mode in air under ambient conditions using iron disc as substrate. Raman spectra were obtained from a confocal microscopic Raman spectrometer (Lab Ram HR Evolution) equipped with a 325 nm laser with a total power of 25-30 mW. In our measurement, the power was set at 50% of the total power, and the time for data collection is 10 s. UV-vis measurements of the CDs solution were carried out on a UV-vis-NIR spectrometer (cary 5000). Fluorescence spectra were obtained by a spectrofluorometer (FluoroMax-4). The absolute

fluorescence quantum yield ( $\Phi$ ) and fluorescence lifetime ( $\tau$ ) were measured with a spectrofluorometer (FLSP920, Edinburgh Instruments LTD). For measurement of  $\Phi$ , the CDs were dissolved in DMF. For other measurements, the CDs were dissolved in ethanol.

### 1.2 Synthesis of CDs

The alkylated, N, Al co-doped CDs (*a*-Al-CDs) were synthesized following the procedures developed by us recently.<sup>1,2</sup> In brief, 9.26 g DDA and 6.2 g AlCl<sub>3</sub> were added to 50 mL ODB. The mixture solution was transferred to a 100 mL three-necked flask for pyrolysis at 140 °C for 48 h. After that, the mixture was naturally cooled to room temperature and purified by silica gel chromatography using *n*-hexane as an eluent to remove ODB first and then ethanol to get *a*-Al-CDs. Ethanol was removed under reduced pressure and the crude product was further dried in vacuum. CDs without Al-doping (*a*-CDs) was obtained by the same way in the absence of AlCl<sub>3</sub>.

### 1.3 Preparation of CDs/PMMA composite films

The CDs/PMMA composite films were prepared by a simple volatilization method. In a typical experiment, 85.7 mg PMMA was added to 2 mL of CH<sub>2</sub>Cl<sub>2</sub>. The mixture was sonicated for 30 min to aid the total dissolution of PMMA. To this CH<sub>2</sub>Cl<sub>2</sub> solution of PMMA was added desired amounts of CDs which was pre-dissolved in 1 mL CH<sub>2</sub>Cl<sub>2</sub>. The mixed solution was sonicated for 10 min before being poured into a glass petri dish with a diameter of 60 mm. The sample was then kept at room temperature for 24 h for solvent evaporation. For *a*-Al-CDs/PMMA composite films, amounts of added *a*-Al-CDs was varied to be 0.43 mg, 0.86 mg, 2.14 mg, 3.10 mg and 4.5 mg, which corresponds to an *a*-Al-CDs content of 0.5 wt%, 1.0 wt%, 2.5 wt%, 3.5 wt% and 5.0 wt%, respectively. For comparison, composite film containing 0.43 mg of *a*-CDs was also prepared using the same strategy.

#### *1.4 Evaluation of NLO properties*

Third-order NLO absorption of the composite films was evaluated using the open-aperture Z-scan technique (Beamtech Optronics Co., Ltd.). A Q-switched Nd: YAG 532 nm laser with a pulse width of 5 ns and a repetition rate of 10 Hz was used as the light source. The laser pulses were focused onto the film using a converging lens and the sample was moved from  $-z$  to  $+z$ , where  $z = 0$  represents the focal point and the data were collected using a dual-channel power meter that was interfaced with a computer using LabVIEW software. The nonlinear absorption coefficient is calculated from the intensity dependent transmittance ( $T$ ), which was measured as a function of  $z$ . The pulse repetition rate was 10 Hz and the beam waist at focus was calculated to be 18  $\mu\text{m}$ . Each measurement was performed at least twice to ensure the reproducibility of the data. The method to obtain values of nonlinear absorption coefficient  $\beta$  could be found elsewhere.<sup>1</sup>

## 2. Additional data

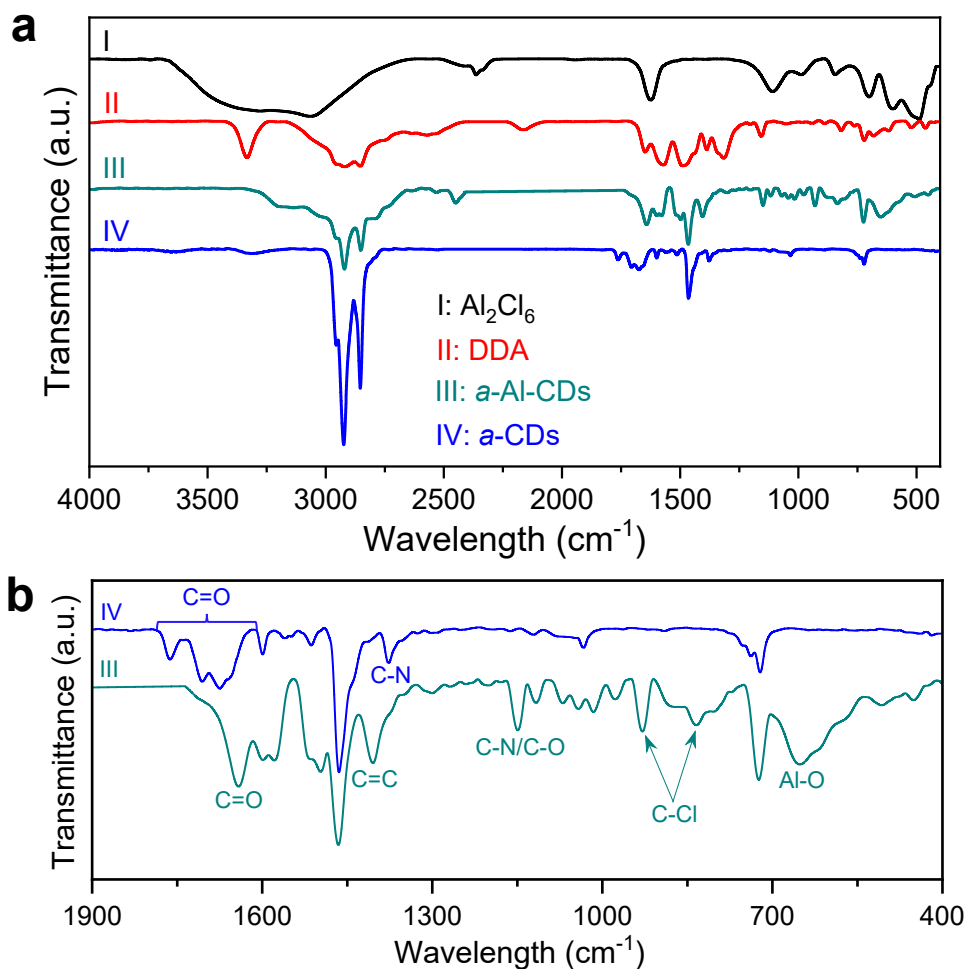

**Fig. S1** a) FTIR spectra of *a*-Al-CDs and *a*-CDs recorded between 4000 and 400  $\text{cm}^{-1}$ . The results from DDA and  $\text{AlCl}_3$  are also included for comparison. b) Enlarged spectra between 1900 and 400  $\text{cm}^{-1}$  for *a*-Al-CDs and *a*-CDs, with interested peaks assigned.

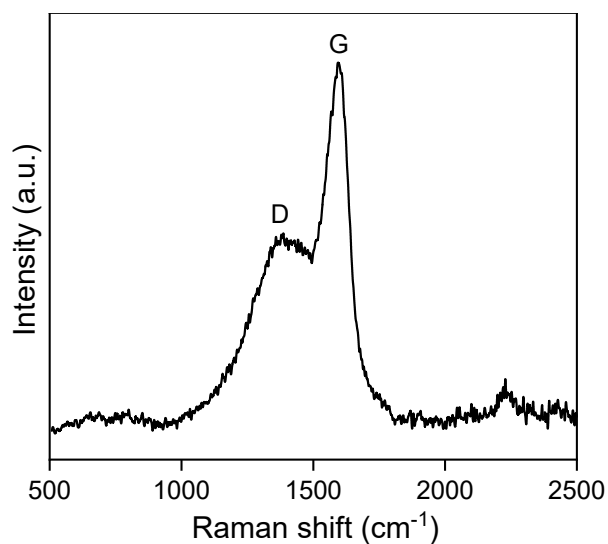

**Fig. S2** Raman spectra of *a*-Al-CDs.

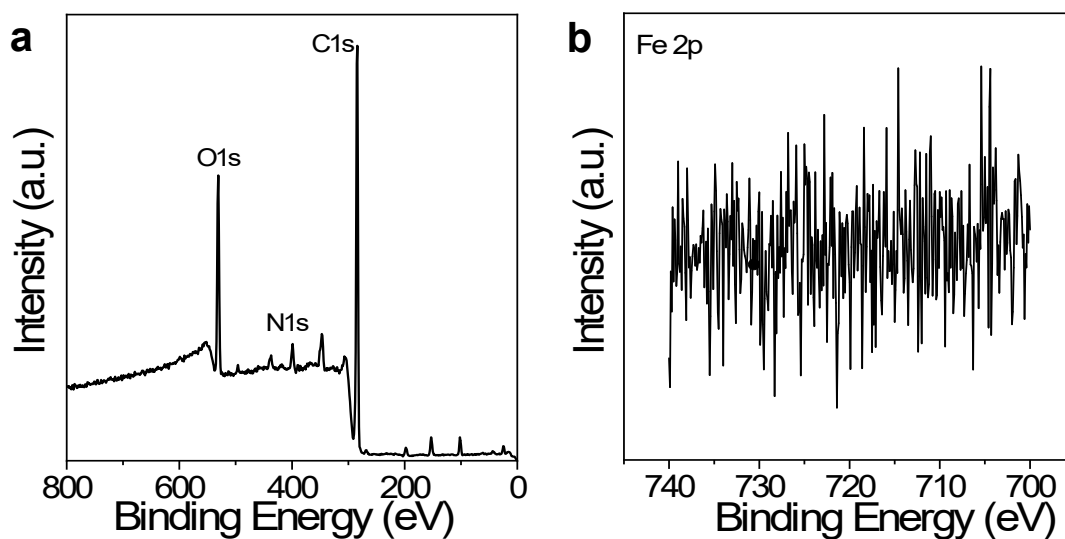

**Fig. S3** Full-range survey (a) and high-resolution Fe2p spectrum (b) of CDs prepared by pyrolyzing DDA in *o*-dichlorobenzene at the presence of anhydrous FeCl<sub>3</sub>. Before measurements, the CDs have been purified by a standard silica gel chromatography following the procedures used for *a*-Al-CDs.

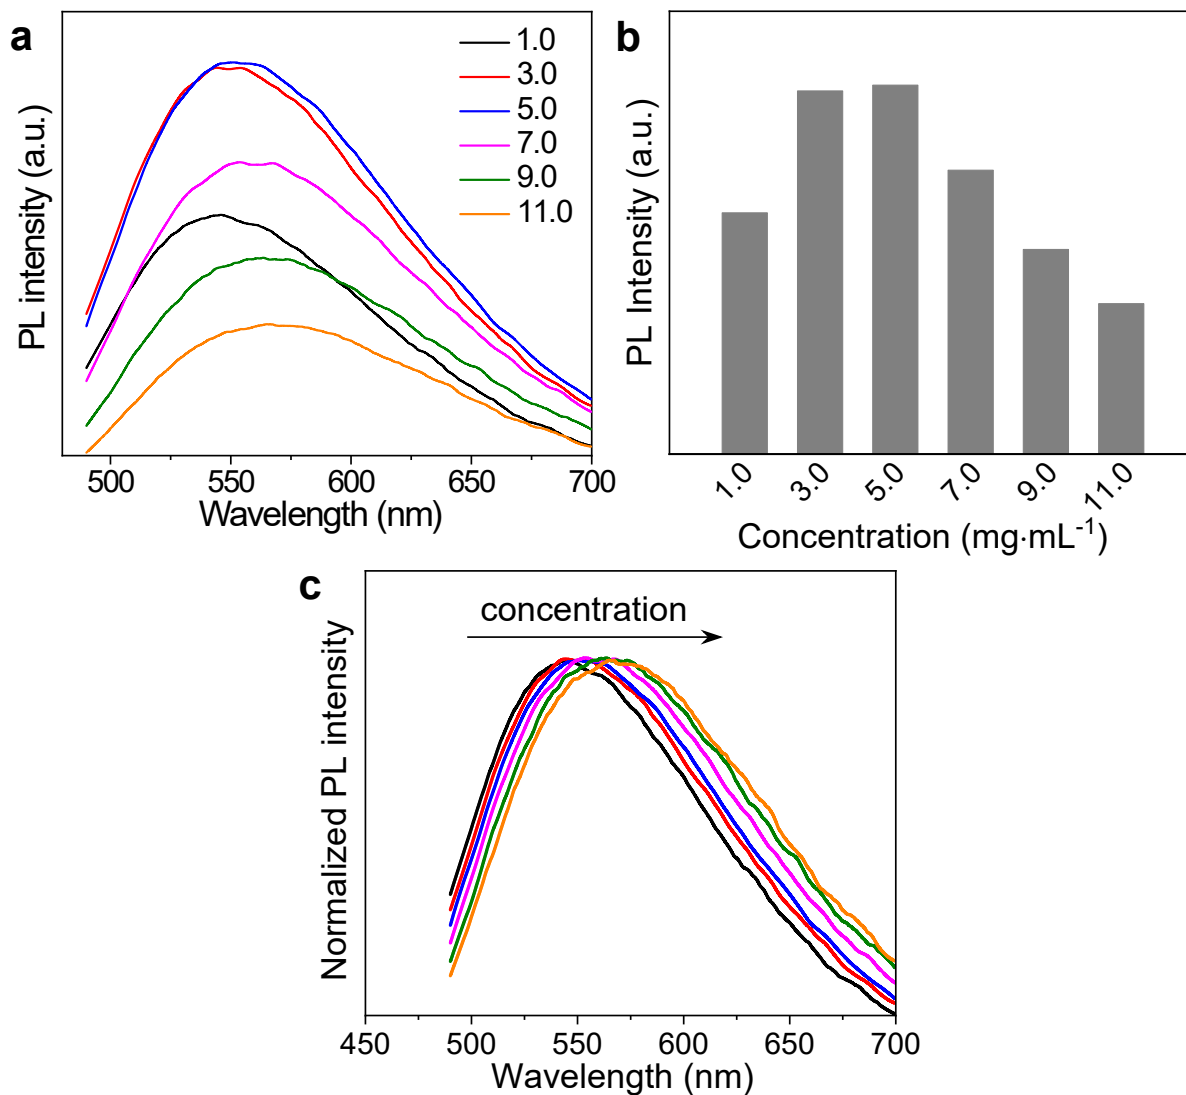

**Fig. S4** The concentration-dependent emission of *a*-Al-CDs. a) Emission curve at  $\lambda_{\text{ex}} = 470$  nm as a function of the concentration of CDs indicated inset (mg·mL<sup>-1</sup>, in ethanol). b) Statistics of the PL intensity as a function of the concentration of CDs. c) Normalized PL intensity of the same series of samples, which highlights the red shift of the emission with increasing concentration of CDs.

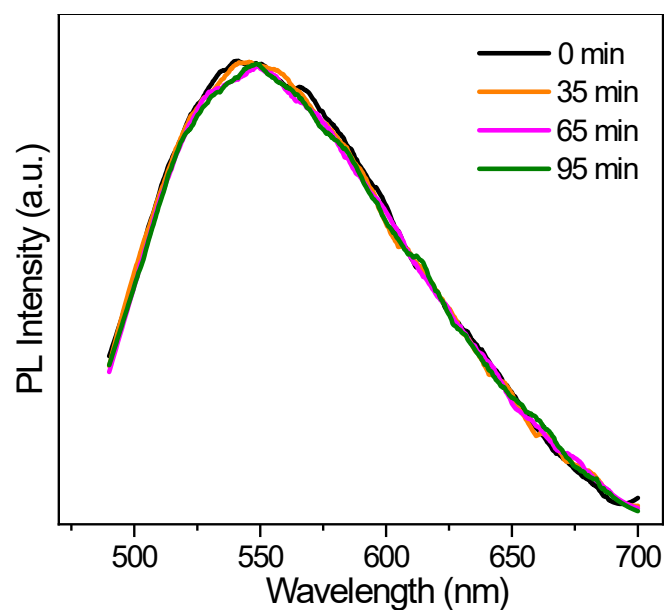

**Fig. S5** Emission of  $\alpha$ -Al-CDs ( $3.0 \text{ mg}\cdot\text{mL}^{-1}$  in ethanol) at  $\lambda_{\text{ex}} = 470 \text{ nm}$  under  $365 \text{ nm}$  UV irradiation for different time as indicated inset.

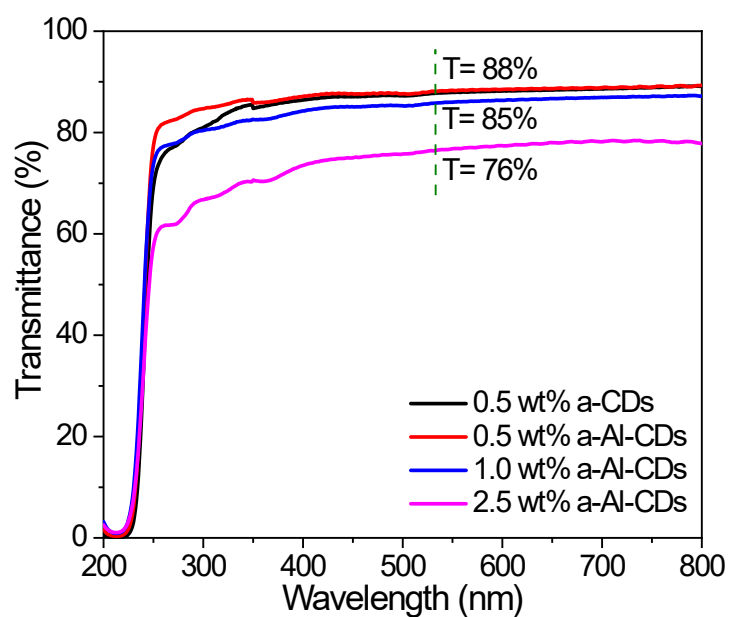

**Fig. S6** Emission of  $\alpha$ -Al-CDs ( $5.0 \text{ mg}\cdot\text{mL}^{-1}$  in ethanol) at  $\lambda_{\text{ex}} = 470 \text{ nm}$  under  $365 \text{ nm}$  UV irradiation for different time as indicated inset.



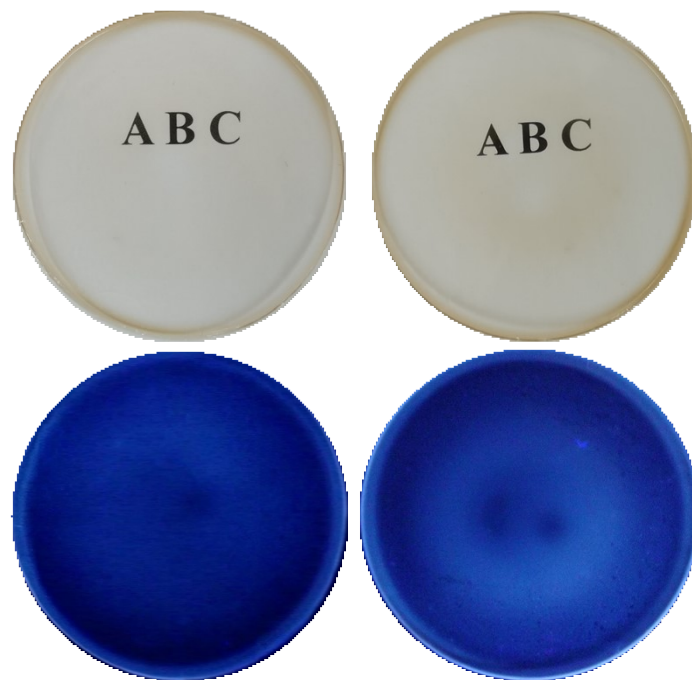

**Fig. S7** Photos of the PMMA-based composite films containing 3.5 wt% (left) and 5.0 wt% (right)  $\alpha$ -Al-CDs, taken under room light (top) and 365 nm UV irradiation (bottom), respectively. Macroscopic phase separation is visible by naked eyes.

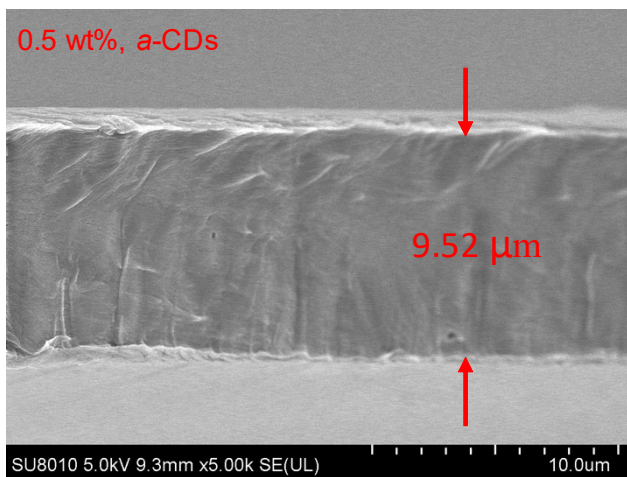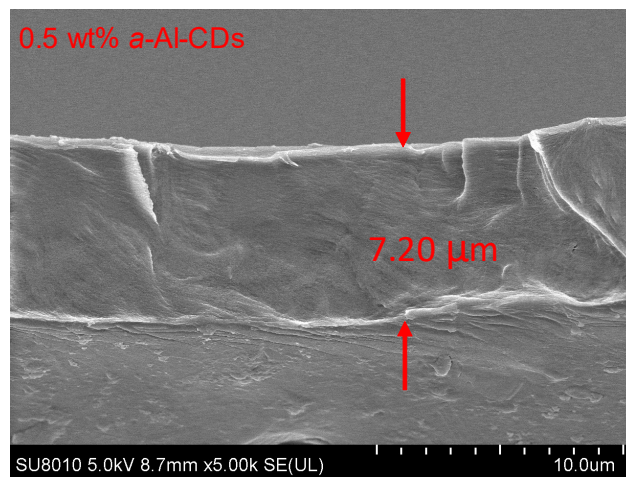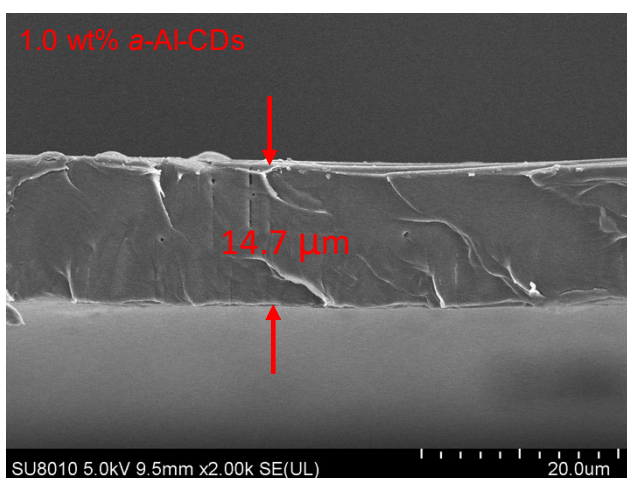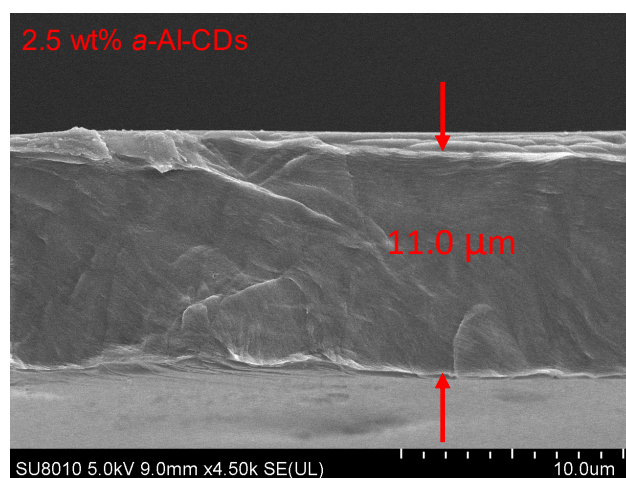

**Fig. S8** SEM images on the fracture surfaces of the four PMMA-based composite films loaded with *a*-CDs or *a*-Al-CDs. The thickness of each film is also shown.

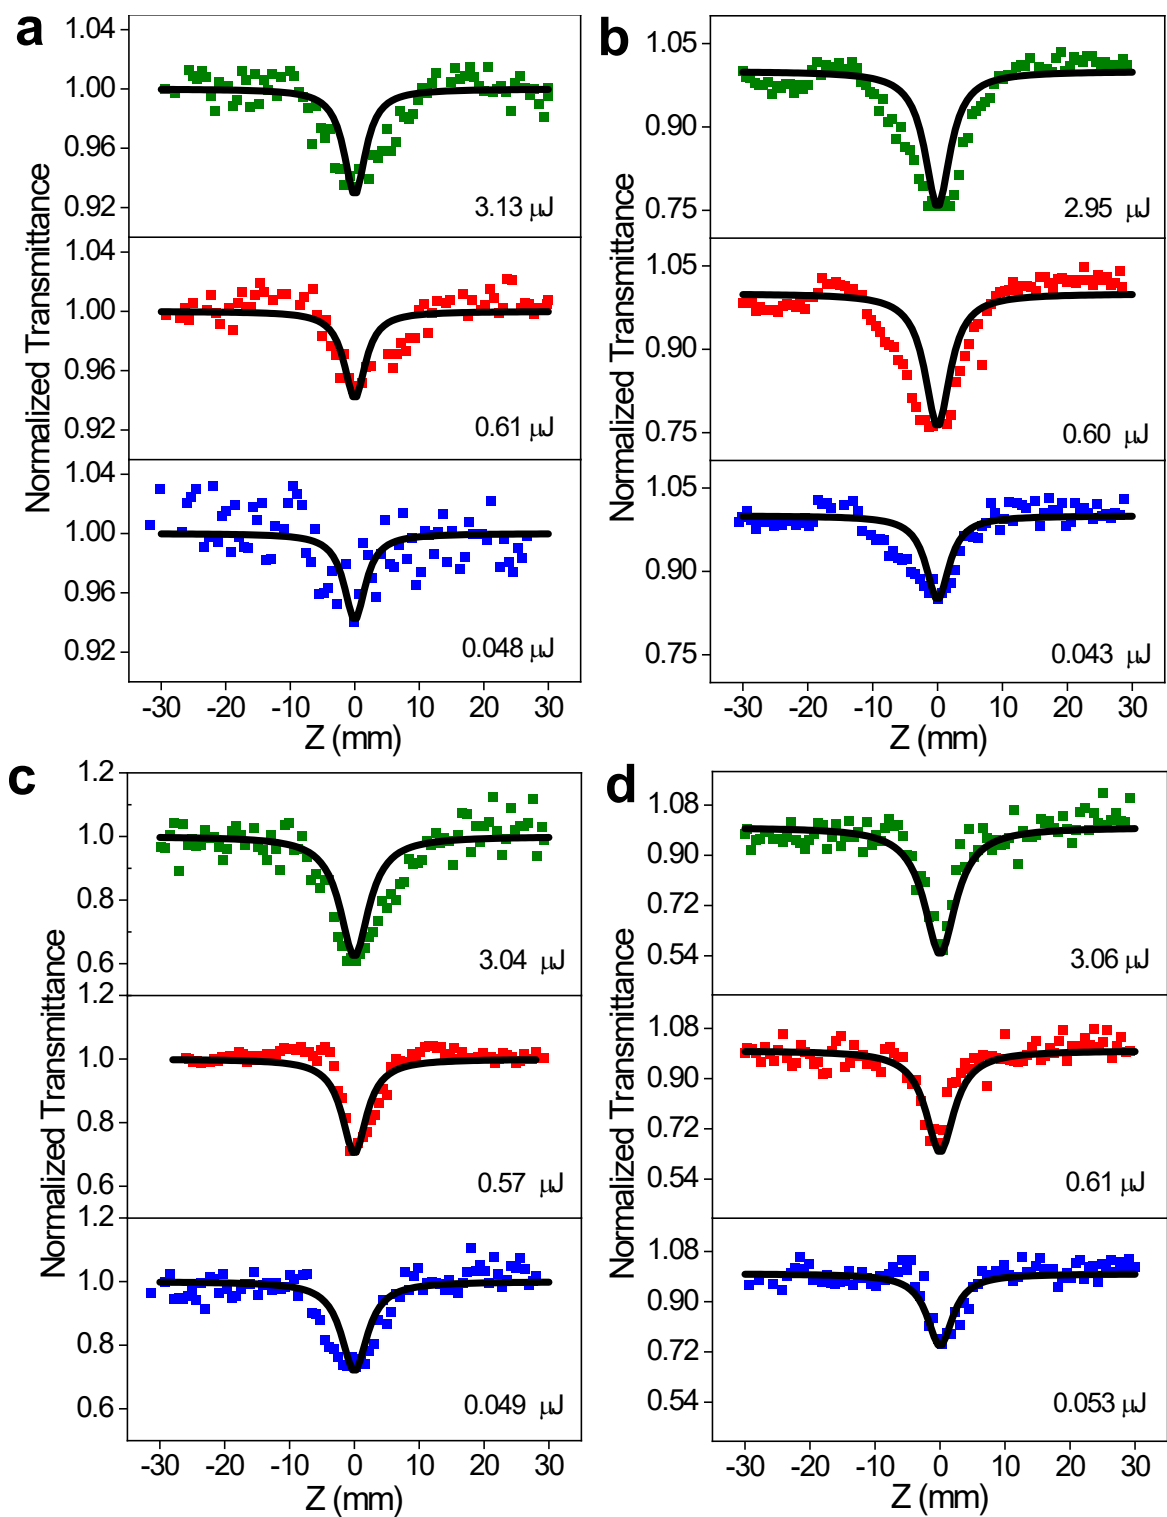

**Fig. S9** Normalized transmittance obtained from open-aperture Z-scan at different energy inputs of the laser for four PMMA-based films containing 0.5 wt% *a*-CDs (a) and 0.5 wt% (b), 1.0 wt% (c), 2.5 wt% (d) *a*-Al-CDs, respectively.

### 3. Tables

**Table S1.** Results of XPS and elemental analysis (EA) of *a*-CDs and *a*-Al-CDs.

|                  |     | Al (%) | N (%) | C (%) | O (%) | Cl (%) | H (%) |
|------------------|-----|--------|-------|-------|-------|--------|-------|
| <i>a</i> -CDs    | XPS | \      | 4.26  | 64.61 | 31.13 | \      | \     |
|                  | EA  | \      | 3.23  | 78.77 | 5.29  | \      | 12.39 |
| <i>a</i> -Al-CDs | XPS | 2.52   | 5.02  | 80.85 | 5.79  | 5.83   | \     |
|                  | EA  | \      | 4.79  | 55.96 | 28.22 | \      | 10.81 |

\: Not present or unavailable by this method.

**Table S2.** Lifetimes from time-resolved fluorescence study, fluorescence quantum yield ( $\Phi$ ), sizes from TEM observations and the wavelength at which maximum emission occurs in steady-state fluorescence measurements ( $\lambda_{em}$ ) for *a*-CDs and *a*-Al-CDs.

| Methods    |                             | <i>a</i> -CDs | <i>a</i> -Al-CDs |
|------------|-----------------------------|---------------|------------------|
| Decay life | $\tau_1$ (ns)               | 2.71 (48.81%) | 3.08 (59.46%)    |
|            | $\tau_2$ (ns)               | 9.19 (51.19%) | 9.57 (40.54%)    |
|            | $\langle \tau \rangle$ (ns) | 6.04          | 5.72             |
|            | QY (%)                      | 14.13         | 5.92             |
|            | Size (nm)                   | 2.62          | 4.61             |
|            | $\lambda_{em}$ (nm)         | 480           | 552              |

**Table S3.** Nonlinear absorption coefficient ( $\beta$ ) for different CDs/PMMA composite films. The thickness of each film obtained from SEM observations ( $L$ ) and the energies of the laser used in open-aperture  $Z$ -scan ( $E$ ) are also included.

| Sample           | $L$ ( $\mu\text{m}$ ) | $E$ ( $\mu\text{J}$ ) | $\beta$ ( $\text{m/W}$ ) |
|------------------|-----------------------|-----------------------|--------------------------|
| 0.5 wt% a-CDs    | 9.52                  | 0.048                 | $1.4 \times 10^{-6}$     |
|                  |                       | 0.61                  | $8.8 \times 10^{-8}$     |
|                  |                       | 3.13                  | $2.1 \times 10^{-8}$     |
| 0.5 wt% a-Al-CDs | 7.20                  | 0.043                 | $6.5 \times 10^{-6}$     |
|                  |                       | 0.6                   | $7.0 \times 10^{-7}$     |
|                  |                       | 2.95                  | $1.5 \times 10^{-7}$     |
| 1.0 wt% a-Al-CDs | 14.7                  | 0.049                 | $6.8 \times 10^{-6}$     |
|                  |                       | 0.57                  | $5.3 \times 10^{-7}$     |
|                  |                       | 3.04                  | $1.7 \times 10^{-7}$     |
| 2.5 wt% a-Al-CDs | 11.0                  | 0.053                 | $7.0 \times 10^{-6}$     |
|                  |                       | 0.61                  | $1.0 \times 10^{-6}$     |
|                  |                       | 3.06                  | $3.1 \times 10^{-7}$     |

**Table S4.** Comparison of the nonlinear optical parameters obtained in current work with previously reported values.

| Materials                                                                                                 | Experimental details                               | Nonlinear optical coefficient $\beta$ | Issuing time | ref |
|-----------------------------------------------------------------------------------------------------------|----------------------------------------------------|---------------------------------------|--------------|-----|
| CDs (from lauryl gallate), chloroform                                                                     | 532 nm, 4 ns, 10 Hz (saturable absorption)         | $-1.4 \times 10^{-9}$ m/W             | 2013         | 3   |
| Hydrophilic CDs (from gallic acid), chloroform                                                            | 532 nm, 4 ns, 1-10 Hz (saturable absorption)       | $-1.4 \times 10^{-9}$ m/W             | 2014         | 4   |
| B-doped CDs (from citric acid, boric acid and urea), distilled water                                      | 532 nm, 4 ns, 10 Hz (reverse saturable absorption) | $5.1 \times 10^{-11}$ m/W             | 2015         | 5   |
| N-doped CDs (from Anhydrous citric acid, silane coupling agent), ethanol                                  | 532 nm, 190 fs, (saturable absorption)             | $-4.8 \times 10^{-13}$ m/W            | 2016         | 6   |
| CDs (from chitin, titania), distilled water                                                               | 400 nm, 85 fs, (reverse saturable absorption)      | $8.8 \times 10^{-14}$ m/W             | 2016         | 7   |
| CDs (from graphite rods), distilled water                                                                 | 532 nm, 4 ns, 10 Hz (reverse saturable absorption) | $4.1 \times 10^{-10}$ m/W             | 2016         | 8   |
| CDs/MOF (from glucose), MOF complex film                                                                  | 532 nm, 4 ns, 1 Hz (reverse saturable absorption)  | $1.6 \times 10^{-11}$ m/W             | 2017         | 9   |
| N, Si-doped CDs (from p-phenylenediamine, n-propyl isocyanate, silane coupling agent), silica gel glasses | 532 nm, 7 ns, 10 Hz (reverse saturable absorption) | $4.21 \times 10^{-10}$ m/W            | 2018         | 10  |
| (CDs)/graphene oxide (GO) (from heparin sodium), aqueous                                                  | 532 nm, 4 ns, 1 Hz (two photon absorption,         | $1.59 \times 10^{-13}$ m/W            | 2018         | 11  |

|                                                                         |                                                                             |                            |      |              |
|-------------------------------------------------------------------------|-----------------------------------------------------------------------------|----------------------------|------|--------------|
|                                                                         | nonlinear scattering)                                                       |                            |      |              |
| (CDs)/graphene oxide (GO) (from graphite rod), silica gel glasses       | 532 nm, 4 ns, 1 Hz (nonlinear absorption, nonlinear scattering)             | $9.0 \times 10^{-11}$ m/W  | 2018 | 12           |
| N-doped CDs (from 2,3-Diaminophenazine, urea), aqueous solution         | 532 nm, 21 ps, 10 Hz (saturable absorption to reverse saturable absorption) | $4.0 \times 10^{-13}$ m/W  | 2019 | 13           |
| CDs (orange waste peels, citric acid), ethylene glycol                  | 532 nm (reverse saturable absorption)                                       | $2.15 \times 10^{-6}$ m/W  | 2019 | 14           |
| CDs/nematic liquid crystal (from ammonium citrate salt), liquid crystal | 532 nm, 7 ns, 10 Hz (reverse saturable absorption)                          | $3 \times 10^{-8}$ m/W     | 2020 | 15           |
| N-doped CDs (from aliphatic amine), pure films                          | 1064 nm, 1.5 ps (reverse saturable absorption)                              | $2.73 \times 10^{-2}$ m/W  | 2020 | 1            |
| N-doped CDs (from 2-aminopyrimidine-5-boronic acid), silica films       | 800 nm, 30 fs (reverse saturable absorption)                                | $4.94 \times 10^{-10}$ m/W | 2020 | 16           |
| N-doped CDs (from sugarcane bagasse pulp), deionized water              | 532 nm (reverse saturable absorption)                                       | $2.51 \times 10^{-6}$ m/W  | 2020 | 17           |
| B-doped CDs (from activated carbon), n-heptane                          | 442 nm (reverse saturable absorption)                                       | $1.49 \times 10^{-6}$ m/W  | 2021 | 18           |
| <i>α</i> -Al-CDs (from aliphatic amine), PMMA films                     | 532 nm, 4 ns, 10 Hz (reverse saturable absorption)                          | $7.0 \times 10^{-6}$ m/W   |      | Current work |

## References

1. K. Yin, D. Lu, W. Tian, R. Zhang, H. Yu, E. Gorecka, D. Pocięcha, N. Godbert, J. Hao, H. Li, *J. Mater. Chem. C* 2020, **8**, 8980-8991.
2. D. Lu, K. Yin, Y. Zhao, Z. Gao, N. Godbert, H. Li, H. Li, J. Hao, *Colloids Surf., A* 2021, **613**, 126129-126136.
3. A. B. Bourlinos, M. A. Karakassides, A. Kouloumpis, D. Gournis, A. Bakandritsos, I. Papagiannouli, P. Aloukos, S. Couris, K. Hola, R. Zboril, M. Krysmann, E. P. Giannelis, *Carbon* 2013, **61**, 640-643.
4. P. Aloukos, I. Papagiannouli, A. B. Bourlinos, R. Zboril, S. Couris, *Opt. Express* 2014, **22**, 12013-12028.
5. A. B. Bourlinos, G. Trivizas, M. A. Karakassides, M. Baikousi, A. Kouloumpis, D. Gournis, A. Bakandritsos, K. Hola, O. Kozak, R. Zboril, I. Papagiannouli, P. Aloukos, S. Couris, *Carbon* 2015, **83**, 173-179.
6. L. Ma, W. Xiang, H. Gao, J. Wang, Y. Ni, X. Liang, *Dyes Pigment.* 2016, **128**, 1-7.
7. Y. N. Kulchin, A. Y. Mayor, D. Y. Proschenko, I. V. Postnova, Yu. A. Shchipunov, *Quantum Electron.* 2016, **46**, 335-337.
8. L. Bai, S. Qiao, Y. Fang, J. Tian, J. Mcleod, Y. Song, H. Huang, Y. Liu, Z. Kang, *J. Mater. Chem. C* 2016, **4**, 8490-8495.
9. Z. Gu, D. Li, C. Zheng, Y. Kang, C. Wöll, J. Zhang, *Angew. Chem. Int. Ed.* 2017, **56**, 6853-6858.
10. J. Ren, X. Sun, Y. Wang, R. Song, Z. Xie, S. Zhou, P. Chen, *Adv. Opt. Mater.* 2018, **6**, 1701273-1701280.
11. C. Zheng, L. Huang, Q. Guo, W. Chen, W. Li, H. Wang, *RSC Adv.* 2018, **8**, 10267-10276.
12. C. Zheng, L. Huang, Q. Guo, W. Chen, W. Li, *Opt. Laser Technol.* 2018, **107**, 281-290.
13. X. Wang, L. Bai, L. Shen, B. Yao, H. Huang, Y. Liu, Y. Song, Z. Kang, *Opt. Mater.* 2019, **95**, 109216-109220.
14. P. Surendran, A. Lakshmanan, G. Vinitha, G. Ramalingam, P. Rameshkumar, *Luminescence.* 2019, **35**, 196-202.
15. K. P. Praseetha, K. Chandrasekharan, V. Soney, *Opt. Laser Technol.* 2020, **130**, 106367-106375.
16. W. K. Kipnusu, C. D. Buendía, M. F. Alonso, J. Lancis, G. M. Vega, *Part. Part. Syst. Character.* 2020, **37**, 2000093-2000102.
17. S. Pandiyan, L. Arumugam, S. P. Srirengan, R. Pitchan, P. Sevugan, K. Kannan, G. Pitchan, T.



A. Hegde, V. Gandhirajan, *ACS Omega*. 2020, **5**, 30363-30372.

18. Y. Orooji, H. G. Gol, B. Jaleh, M. R. R. Vaziri, M. Eslamipناه, *Nanomaterials*. 2021, **11**, 737-752.
